# Supplementary material
Source: Springer Nature journal article supplement (https://www.springerprofessional.de/resource/supplementary/13638_2013_1040_MOESM3_ESM.pdf/11899112)

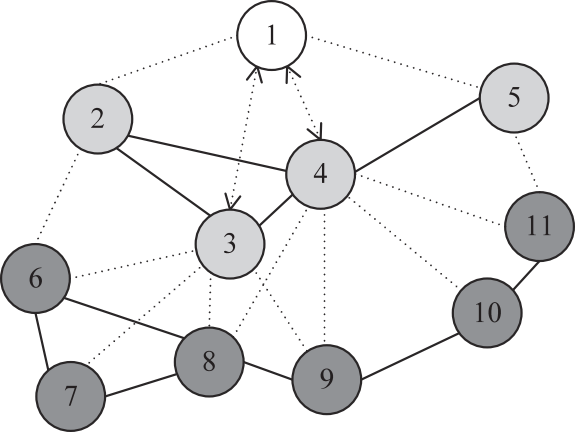

Supplement: MOESM3 [file 11899112]
